## Estrogen-Related Receptor- $\alpha$ Coordinates Transcriptional Programs Essential for Exercise Tolerance and Muscle Fitness

Marie-Claude Perry, Catherine R. Dufour, Ingrid S. Tam,\* Wafa B'chir,\* and Vincent Giguère

Goodman Cancer Research Centre (M.-C.P., C.R.D., I.S.T., W.B., V.G.), McGill University, Montréal, Québec, H3A 1A3, Canada; and Departments of Biochemistry (M.-C.P., V.G.), Medicine (I.S.T., V.G.), and Oncology (V.G.), McGill University, Montréal, Québec H3G 1Y6, Canada

Muscle fitness is an important determinant of health and disease. However, the molecular mechanisms involved in the coordinate regulation of the metabolic and structural determinants of muscle endurance are still poorly characterized. Herein, we demonstrate that estrogen-related receptor  $\alpha$  (ERR $\alpha$ , NR3B1) is essential for skeletal muscle fitness. Notably, we show that ERR $\alpha$ -null animals are hypoactive and that genetic or therapeutic disruption of ERR $\alpha$  in mice results in reduced exercise tolerance. Mice lacking ERR $\alpha$  also exhibited lactatemia at exhaustion. Gene expression profiling demonstrates that ERR $\alpha$  plays a key role in various metabolic processes important for muscle function including energy substrate transport and use (*Ldhd*, *Slc16a1*, *Hk2*, and *Glu1*), the tricarboxylic acid cycle (*Cycs*, and *Idh3g*), and oxidative metabolism (*Pdha1*, and *Uqcrcq*). Metabolomics studies revealed impairment in replenishment of several amino acids (eg, glutamine) during recovery to exercise. Moreover, loss of ERR $\alpha$  was found to alter the expression of genes involved in oxidative stress response (*Hmox1*), maintenance of muscle fiber integrity (*Trim63*, and *Hspa1b*), and muscle plasticity and neovascularization (*Vegfa*). Taken together, our study shows that ERR $\alpha$  plays a key role in directing transcriptional programs required for optimal mitochondrial oxidative potential and muscle fitness, suggesting that modulation of ERR $\alpha$  activity could be used to manage metabolic myopathies and/or promote the adaptive response to physical exercise. (*Molecular Endocrinology* 28: 2060–2071, 2014)

Skeletal muscle is the largest organ system of the human body, accounting for more than 40% of the mass of a given nonobese individual. It is important not only for locomotion and physical strength but also for whole-body energy metabolism and substrate turnover. It is therefore not surprising that muscle fitness is an important determinant of health and disease.

Muscle endurance, strength, and fatigability depend on a variety of factors including substrate uptake and handling for energy production, mitochondrial function, and composition of the contractile machinery (1–3). Skeletal muscle fibers can be broadly classified based on their

contractile properties as either slow-twitch (type I) or fast-twitch (type II) and are tightly associated with morphological, metabolic, and functional properties. More specifically, slow-twitch muscles, also called red muscles, are rich in mitochondria and capillary supply, rely largely on mitochondrial fatty acid oxidation for ATP production, and are specialized for endurance activity (4). In contrast, fast-twitch muscles, also referred to as white muscles, are more glycolytic and are more important for phasic activity (4). Skeletal muscles exhibit remarkable plasticity in that they can undergo changes in fiber-type composition, mitochondrial biogenesis, and energy met-

ISSN Print 0888-8809 ISSN Online 1944-9917

Printed in U.S.A.

Copyright © 2014 by the Endocrine Society

Received August 29, 2014. Accepted October 27, 2014.

First Published Online October 31, 2014

\* I.S.T. and W.B. contributed equally to this work.

Abbreviations: C29, compound 29; ERR $\alpha$ , estrogen-related receptor  $\alpha$ ; GC, glucocorticoid; IPA, Ingenuity Pathway Analysis;  $\alpha$ -KGDH,  $\alpha$ -ketoglutarate dehydrogenase; KO, knockout; NRF2, nuclear respiratory factor 2; PGC-1, peroxisome proliferator-activated receptor  $\gamma$ -coactivator-1; qRT-PCR, quantitative RT-PCR; RER, respiratory exchange ratio; TCA, tricarboxylic acid; VCO<sub>2</sub>, carbon dioxide production; VO<sub>2</sub>, oxygen consumption; WT, wild-type.

abolic pathways to adapt to physiological factors such as physical activity and exercise. However, the molecular mechanisms involved in the coordinate regulation of the metabolic and structural determinants of muscle fitness and endurance are still poorly characterized.

Numerous studies have implicated estrogen-related receptor  $\alpha$  (ERR $\alpha$ , NR3B1), an orphan nuclear receptor belonging to the subfamily of classic steroid hormone receptors (5), in the regulation of a wide array of metabolic programs (6–8). Anatomical profiling of ERR $\alpha$  expression showed that the receptor segregated with tissues with high energy demands such as the heart, kidneys, intestinal tract, skeletal muscle, and brown adipose tissue, suggesting an involvement of ERR $\alpha$  in transducing metabolic signals to regulate bioenergetics processes (9–11). Indeed, ERR $\alpha$  was subsequently shown to be essential for the high levels of mitochondrial biogenesis and oxidative capacity of the brown adipose tissue to provide the energy necessary for thermogenesis (12). In addition, ERR $\alpha$  was shown to play a critical role in cardiac function. Notably, hearts of ERR $\alpha$ -deficient animals are smaller and have decreased expression of genes involved in energy substrate oxidation, ATP synthesis, and phosphate transfer and in other aspects of heart function including contractile and structural properties, resulting in reduced energetic reserve capacity and accelerated failure in response to hemodynamic stressors (13, 14). Collectively, these and subsequent studies highlighted an important role for the receptor in several aspects of energy metabolism in both normal and cancer cells (6, 15, 16).

Despite the observed link between ERR $\alpha$ , the control of metabolic gene programs and mitochondrial biogenesis in highly oxidative tissues, the roles of ERR $\alpha$  in skeletal muscle function are still poorly characterized. In vitro, during myogenesis, endogenous expression of ERR $\alpha$  increases to regulate gene programs involved in specialized myocyte function (eg, sarcomeric protein expression) and mitochondrial biogenesis as well as glucose and fatty acid oxidation (17–19). In addition, at a later stage of differentiation, ERR $\alpha$  was shown to be important for the oxidative capacity of the myotubes (17). It was also recently suggested that ERR $\alpha$  has a role in skeletal muscle regeneration in response to cardiotoxin injury (17–19). Taken together, these findings support a role for the receptor in muscle growth and regeneration. However, the global impact of ERR $\alpha$  deficiency on skeletal muscle function has not yet been explored. Herein, we used a physiological genomics/metabolomics approach to investigate the impact of the absence of ERR $\alpha$  on muscle fitness. Our results demonstrate that ERR $\alpha$  controls transcriptional programs that are essential for exercise tolerance and muscle fitness.

## Materials and Methods

### Animals

Mice were housed and maintained in a pathogen-free housing facility at McGill University, and all mouse manipulations were performed in accordance with the McGill Facility and Canadian Council on Animal Care. The generation of ERR $\alpha$ -knockout (KO) animals was previously described (20). The KO animals were derived from a pure FVB genetic background. For all animal studies, 2- to 3-month-old mice were used. For compound 29 (C29) treatments, wild-type (WT) mice were randomly assigned to receive daily ip injections of C29 (10 mg/kg) (OmegaChem Inc) diluted in Ringer's solution (containing 5.2% polyethylene glycol and 5.2% Tween 80) or vehicle alone ( $n = 12$  for each group). Ten days after the first injection, muscle endurance was assessed.

### Treadmill exercise

One day before the treadmill experiments, animals ( $n = 12$  for each group, male and female) were acclimatized to treadmill running (Columbus Instruments) for 5 minutes on a 0% degree grade and at a speed of 5 m/min. The day of the exercise stress test, mice ran on a treadmill with a 5° inclination uphill at a speed of 5 m/min for the first 5 minutes. The speed was increased by 5 m/min every subsequent 5 minutes until a maximal speed of 25 m/min or until exhaustion was reached. The treadmill experiment was stopped when mice stayed for 5 seconds continuously on the electrical grid. A maximal score of 2000 m was given to mice that did not reach exhaustion before this distance was reached. Time to exhaustion and total running distance were determined using the apparatus. Work (joules) and power (watts) were calculated, with work being the product of body weight (kilograms), gravity (9.81 m/s<sup>2</sup>), vertical speed (meters per second times angle), and time (seconds) and power calculated as the product of body weight (kilograms), gravity (9.81 m/s<sup>2</sup>) and vertical speed (meters per second times angle).

### Metabolic cage measurements

Spontaneous activity and energy metabolism studies were performed on mice ( $n = 8$  for each group, male and female) under a consistent temperature (25°C) using an indirect calorimeter (Oxymax; Columbus Instruments). The day before the experiment, mice were weighed and placed in individual chambers at 25°C. After acclimation, metabolic parameters (oxygen consumption [VO<sub>2</sub>] and carbon dioxide production [VCO<sub>2</sub>]) were recorded for 48 hours. Exhaust air from each chamber was sampled at 10-minute intervals for a period of 30 seconds, and sample air was sequentially passed through O<sub>2</sub> and CO<sub>2</sub> sensors for determination of O<sub>2</sub> and CO<sub>2</sub> content. VO<sub>2</sub> and VCO<sub>2</sub> values were normalized with respect to body weight and VO<sub>2</sub>, VCO<sub>2</sub>, respiratory exchange ratio (RER), and heat were calculated using Oxymax software included with the calorimeter. The voluntary locomotive activity was quantified using the infrared beam interruptions in horizontal (X) directions (XAMB). To control for circadian fluctuations in activity and metabolism, experiments were always started at Zeitgeber time 6 to 8.

### Blood and tissue metabolite measurements

Blood glucose and lactate were measured before and immediately after exercise from tail lateral vein blood using a

OneTouch Ultra2 glucose meter (LifeScan) and Lactate Scout (Lactate.com), respectively. Liver and skeletal muscle (gastrocnemius and soleus) glycogen levels were assessed using an available quantification kit (Abcam; ab169558). Serum and skeletal muscle (gastrocnemius and soleus) triglyceride and free fatty acid levels were determined using available quantification kits (Abcam; ab65341 and ab65336, respectively). Skeletal muscle (gastrocnemius and soleus)  $\alpha$ -ketoglutarate dehydrogenase enzyme activity was determined using an available quantification kit (BioVision; K678–100).

### Metabolomics analyses

Metabolite measurements were performed on liver and skeletal muscle (gastrocnemius and soleus) by liquid chromatography tandem mass spectrometry in collaboration with the Goodman Cancer Research Centre Metabolomics Core Facility (<http://gcrmetabolomics.lab.mcgill.ca>). Specific metabolite transitions for quantifier/qualifier ions and electrospray ionization source modes are listed in Supplemental Table 1. Detailed methodology is provided in Supplemental Materials and Methods.

### Histology

Tissues were fixed with 10% formalin followed by paraffin embedding. Serial 4- $\mu$ m sections were immunostained with CD31. Slides were scanned with an Aperio ScanScope instrument (Aperio Technologies Inc) and viewed with Aperio's ImageScope software, and CD31 immunostaining was analyzed using an optimized Aperio algorithm ( $n = 8$  per condition). Histology experiments were performed in collaboration with the Goodman Cancer Research Centre Histology Core Facility.

### Expression analyses

Total RNA from mouse tissues was extracted using the RNeasy tissue mini kit and the RNeasy fibrous tissue mini kit (QIAGEN) for liver and gastrocnemius samples, respectively. mRNA was reverse-transcribed into cDNA using Superscript (Invitrogen) and quantified by quantitative RT-PCR (qRT-PCR) on a LightCycler 480 instrument (Roche) using LightCycler 480 SYBR Green I master reagents (Roche). The relative expression was normalized to *Rplp0*. Gene-specific primers used for qRT-PCR analysis are listed in Supplemental Table 2.

### Microarray preparation and analyses

Microarray analyses were performed on gastrocnemius muscle isolated from mice before exercise (sedentary) and 2 hours after exercise (1 run on a treadmill to exhaustion) at the McGill University Génome Québec Innovation Centre. Samples were run on Affymetrix Genechip Mouse gene version 2.0 ST arrays following Affymetrix's standard procedures ( $n = 3$  per condition). The data were analyzed using Expression Console and Transcriptome Analysis Console software (Affymetrix, Inc). We considered linear 1.2-fold changes and a  $P$  value threshold of .05 as the cutoff to identify differentially expressed genes (Supplemental Table 3). Ingenuity Pathway Analysis (IPA) software was used to identify enriched canonical pathways.

### Statistical analyses and accession numbers

Bars in the graphical data represent means  $\pm$  SEM. Data were compared by the Student's unpaired two-tailed  $t$  test or by

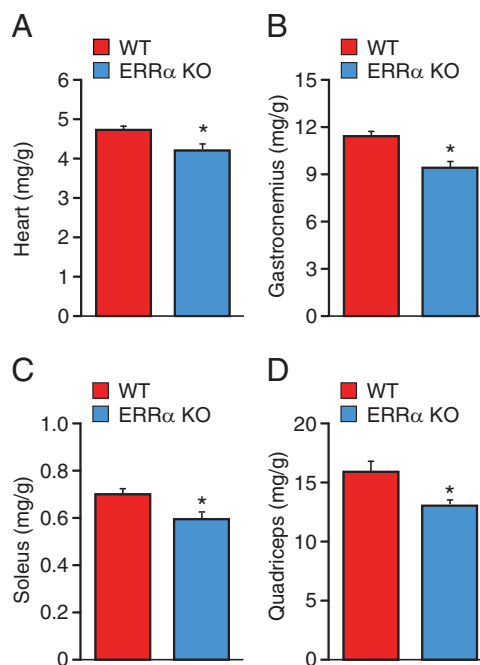

**Figure 1.** Decreased muscle mass in ERR $\alpha$ -KO mice. A–D, Indexed mass to body weight ratios of heart (A), gastrocnemius (B), soleus (C), and quadriceps (D) in 3-month old WT and ERR $\alpha$ -null mice. Data are expressed as means  $\pm$  SEM;  $n = 12$  mice per group. \*,  $P < .05$  by unpaired  $t$  test.

log-rank Mantel-Cox test, and  $P$  values  $\leq .05$  were considered statistically significant. Microarray data are available in the NCBI's Gene Expression Omnibus (GEO) database (<http://www.ncbi.nlm.nih.gov/geo>) under the accession number GSE61712.

## Results

### ERR $\alpha$ -deficient mice are hypoactive and exhibit decreased exercise capacity

Phenotypic characterization of the ERR $\alpha$ -null mice revealed significantly reduced heart, gastrocnemius, soleus, and quadricep muscle mass relative to WT mice (Figure 1, A–D). Because reduction of muscle mass may impact global locomotion and muscle endurance, we thus investigated the consequence of ablation of ERR $\alpha$  expression in mice on their physical activity and exercise capacity. To this end, we first monitored spontaneous locomotor activity of WT and ERR $\alpha$ -null mice over a 24-hour period in comprehensive laboratory animal monitoring systems (CLAMS) metabolic cages. ERR $\alpha$ -deficient animals were found to exhibit significant hypoactivity during both their light and dark cycles, with a similar decrease in physical activity in both cycles compared with control mice (Figure 2, A and B). We next determined whether the decreased global locomotion observed in the ERR $\alpha$ -null mice translated into reduced treadmill performance during a forced exercise challenge. The mice were allowed to run until

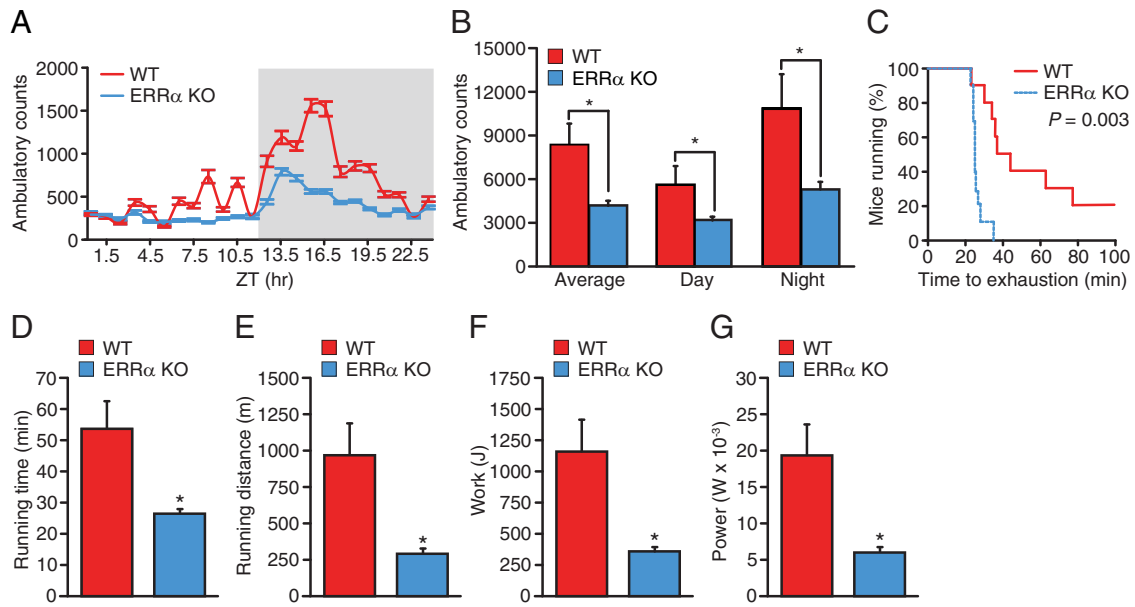

**Figure 2.** Mice lacking *ERRα* exhibit an abnormal skeletal muscle functional phenotype. A, Circadian patterns of voluntary locomotive activity were recorded in a comprehensive cage monitoring system. B, Average spontaneous physical activity of male WT and KO mice ( $n = 8$  per group). C–G, Measure of muscle endurance with dynamic fiber contractions. Two-month-old male WT and KO mice were run on a treadmill with a 5° inclination and increasing speed to exhaustion ( $n = 12$  per group). Endurance capacity (C), time (D), distance (E), work (F), and power (G) were calculated from the individual performances. A maximal score of 2000 m was given to mice that did not get exhausted. Values are expressed as means  $\pm$  SEM (B and D–G). \*,  $P < .05$  by log-rank Mantel-Cox test (C) or by unpaired  $t$  test (B and D–G).

exhaustion or until a cutoff distance of 2000 m was achieved. Mice lacking *ERRα* ran for a significantly shorter time relative to WT mice (26 vs 54 minutes), demonstrating a reduced exercise tolerance in these mice (Figure 2, C and D). Accordingly, the *ERRα*-KO mice ran for a significantly shorter distance and performed less work compared with the WT mice (Figure 2, E and F). Moreover, loss of *ERRα* resulted in a significantly lower short-term high-intensity performance, referred to herein as power (Figure 2G). Given that studies regarding skeletal muscle have reported a gender effect (21), physical activity and exercise capacity were also assessed in female mice. Female *ERRα*-null mice were found to have reduced voluntary physical activity and a diminished endurance capacity and short-term high-intensity performance in a

manner similar to that observed using male mice (Supplemental Figure 1, A–G). Taken together, the data clearly identify *ERRα* as a key player in exercise tolerance.

Next, the highly selective *ERRα* inverse agonist (C29) (22) was used to validate our findings that the genetic loss of *ERRα* lowers the exercise capacity of mice. To this end, mice administered C29 daily over a 10-day period were allowed to run to exhaustion on a treadmill. Consistent with the results observed with the *ERRα*-null animals, C29-treated WT male mice were able to run for only 34 minutes on average until exhaustion compared with 56 minutes for control-treated mice (Figure 3, A and B). The distance ran, work, and power generated by the C29-treated male animals were also significantly lower than those of the control mice (Figure 3, C–E). Similar results

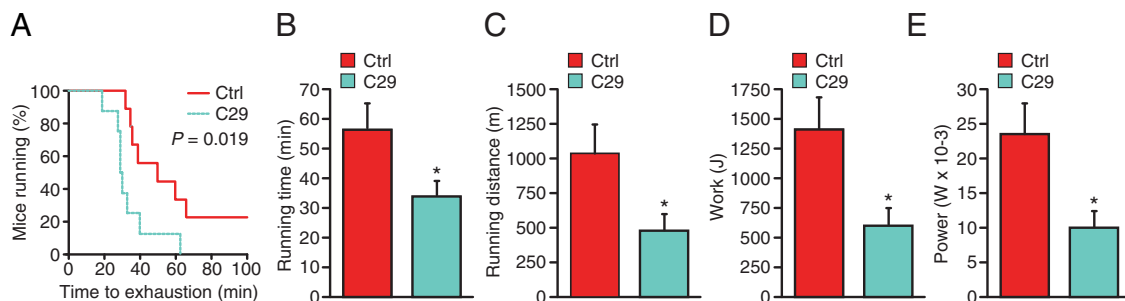

**Figure 3.** Pharmacological inhibition of *ERRα* in mice limits exercise tolerance. Two-month old male C29-treated or control mice were run on a treadmill with a 5° inclination and increasing speed to exhaustion. A–E, Endurance capacity (A), time (B), distance (C), work (D), and power (E) were calculated from the individual performances. A maximal score of 2000 m was given to mice that did not get exhausted ( $n = 12$  per group). Values are expressed as means  $\pm$  SEM (B–E). \*,  $P < .05$  by log-rank Mantel-Cox test (A) or by unpaired  $t$  test (B–E).

were obtained in C29-treated female mice (Supplemental Figure 1, H–L). Overall, the results demonstrate that genetic or pharmacological inhibition of ERR $\alpha$  impairs exercise capacity in both male and female mice.

### ERR $\alpha$ -deficient mice display alterations in energy production

Differences in endurance are frequently associated with alterations in energy production. Thus, we sought to investigate the basal global metabolism of the ERR $\alpha$ -null animals using indirect calorimetry. Although no significant differences in VO<sub>2</sub>, VCO<sub>2</sub>, and energy expenditure were observed between ERR $\alpha$ -null mice and WT littermates of both genders (Supplemental Figure 3), a significant difference in the RER could be observed between the 2 genotypes (Figure 4, A and B). The RER was higher for both genders in the KO animals, suggesting that mice lacking ERR $\alpha$  rely more on carbohydrates than lipids as substrates for energy production. We next measured blood lactate and glucose levels in the mice before and immediately after exhaustive exercise as further indicators of glycolytic and oxidative metabolism. ERR $\alpha$ -KO mice were found to have a small pre-exercise decrease in

blood glucose levels compared with WT animals, supporting a greater global reliance on carbohydrates in these mice (Figure 4C). In WT mice, exhaustive exercise was found to lower blood glucose levels without a concomitant increase in lactate levels (Figure 4, C and D). In sharp contrast, exhausted ERR $\alpha$ -null mice were found to have a significant accumulation in blood lactate levels, although no change in glucose levels was observed (Figure 4, C and D). These results suggest a deficiency in lactate handling due to a defect in oxidative metabolism and/or gluconeogenesis in the mutant mice. Previous reports have shown a repressive role of ERR $\alpha$  on gluconeogenic gene expression (23, 24). In agreement with these observations, livers of ERR $\alpha$ -null mice were found to have increased transcript levels of *Pck1* (Figure 4E), suggesting that the accumulation of lactate in the blood of ERR $\alpha$ -null mice is likely due to impaired mitochondrial oxidative metabolism, not gluconeogenesis.

### ERR $\alpha$ regulates energetic gene programs in muscle

To further understand the molecular basis for the metabolic defects and diminished exercise capacity observed in ERR $\alpha$ -KO mice in addition to understanding the role

of ERR $\alpha$  in the molecular adaptation to exercise, gene expression profiling studies were performed on gastrocnemius muscle isolated before and 2 hours after acute endurance exercise in KO and WT animals. Experiments were performed on gastrocnemius muscle because this is a major calf muscle, containing a combination of fiber types (slow- and fast-twitch), which is used for both powerful bursts of activity and sustained but slower movements (25). Because acute exercise alters the transcriptome with maximal changes in gene expression generally occurring between 3 and 12 hours after exercise (26), we selected a 2-hour time point after exercise to uncover ERR $\alpha$ -dependent early response genes.

First, we compared the genes that were differentially regulated in the ERR $\alpha$ -null mice (vs WT mice) before and after exercise. Gene expression analyses identified 772 modulated genes in the pre-exercised ERR $\alpha$ -KO gastrocnemius and 857 genes after exercise (Figure 5A).

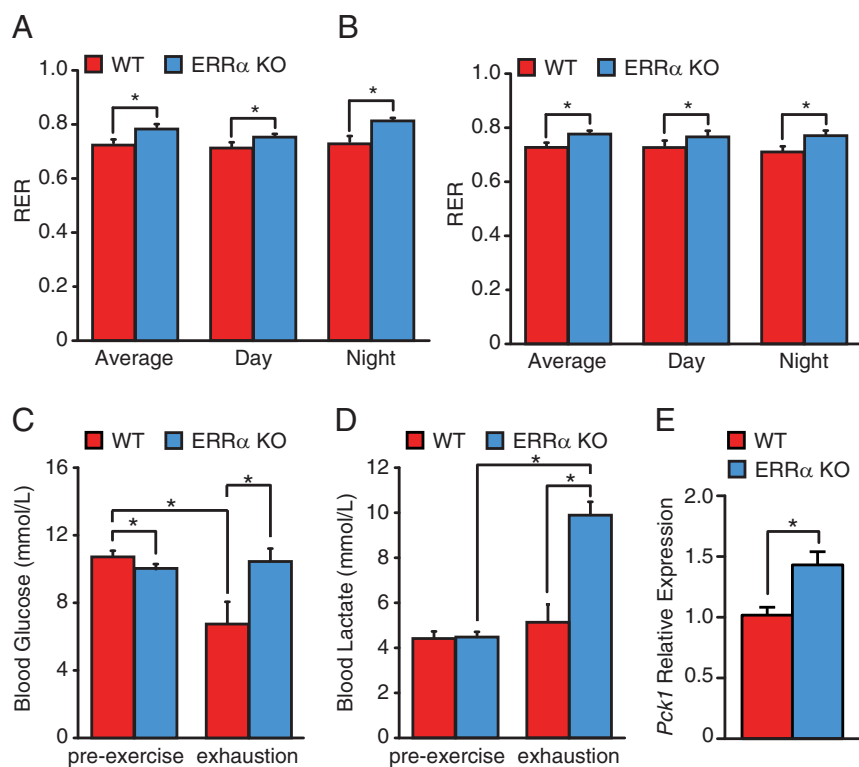

**Figure 4.** Increased use of carbohydrates for energy production in ERR $\alpha$ -KO mice. A and B, The RER in male (A) and female (B) mice was measured during a 24-hour period by indirect calorimetry in WT and ERR $\alpha$ -KO mice. C and D, Blood glucose (C) and lactate (D) levels in WT and ERR $\alpha$ -KO male mice before and after exercise. Data are expressed as means  $\pm$  SEM; n = 8 mice per group. \*,  $P < .05$  by unpaired  $t$  test. E, qRT-PCR analysis of hepatic *Pck1* expression in WT and ERR $\alpha$ -null mice under basal conditions. Data are normalized to *Rplp0* levels and expressed as means  $\pm$  SEM. \*,  $P < .05$  by unpaired  $t$  test.

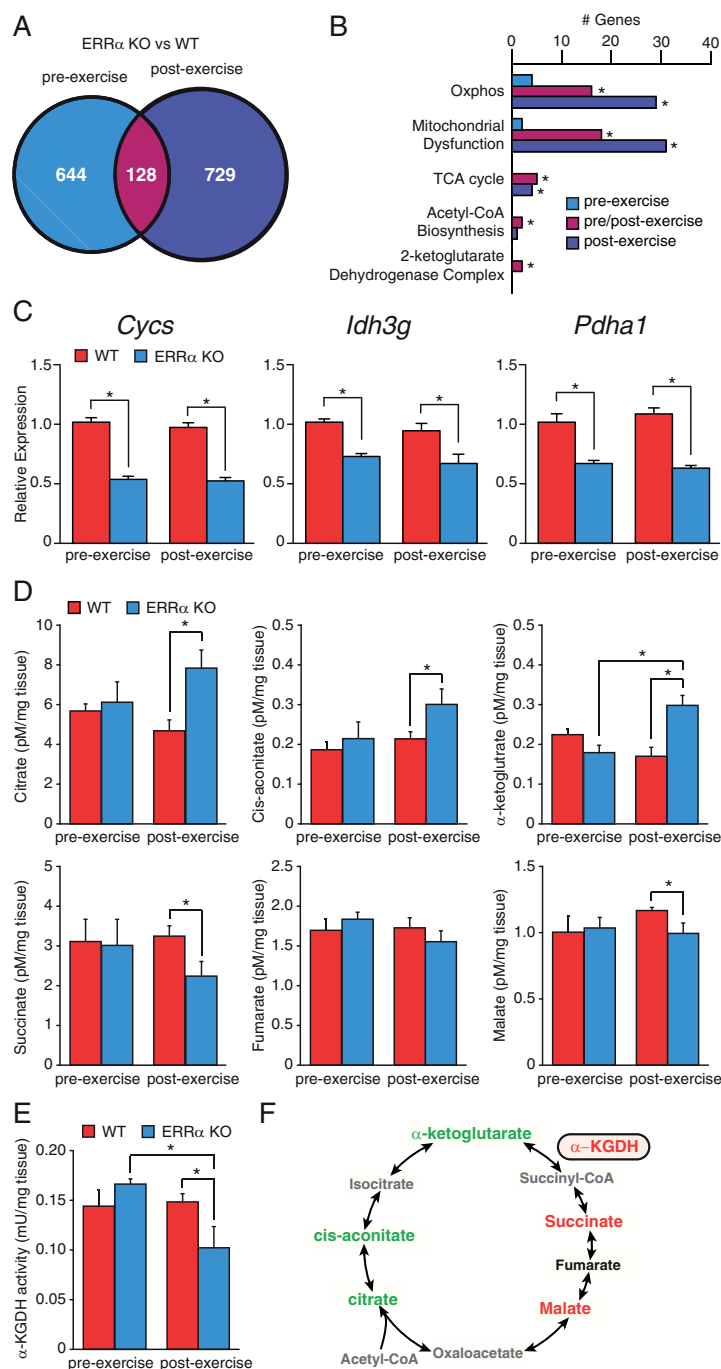

**Figure 5.** Loss of ERR $\alpha$  impairs metabolic and exercise-dependent transcriptional programs in skeletal muscle. **A**, Venn diagrams illustrating the overlap in the number of altered genes in ERR $\alpha$ -null gastrocnemius before and after exercise. **B**, The number of altered genes in ERR $\alpha$ -KO mice within metabolic pathways identified by IPA analysis are shown. \* $P < .05$ . **C**, qRT-PCR analysis of metabolic genes that are ERR $\alpha$ -dependent in gastrocnemius isolated from WT and ERR $\alpha$ -null before and after exercise. Data are normalized to *Rplp0* levels and expressed as means  $\pm$  SEM. \*,  $P < .05$  by unpaired *t* test. **D**, Quantification of TCA cycle intermediates by liquid chromatography tandem mass spectrometry in skeletal muscle collected from WT and ERR $\alpha$ -KO mice before and after exercise\*,  $P < .05$  by unpaired *t* test. **E**, Quantification of  $\alpha$ -ketoglutarate dehydrogenase ( $\alpha$ -KGDH) enzyme activity in skeletal muscle collected from WT and ERR $\alpha$ -KO mice before and after exercise\*,  $P < .05$  by unpaired *t* test. **F**, Schematic summarizing the TCA cycle alterations identified in ERR $\alpha$ -null skeletal muscle after exercise. Green, increased metabolite levels; red, decreased metabolite levels and  $\alpha$ -KGDH enzyme activity (boxed); black, no change; gray, not measured.

Functional analyses of the differentially regulated genes at before and after exercise using IPA software revealed a large set of ERR $\alpha$ -dependent genes involved in mitochondrial dysfunction and energy metabolism (eg, oxidative phosphorylation and the tricarboxylic acid [TCA] cycle). Many genes were deregulated in the KO animals after exercise, indicating that ERR $\alpha$  has a role in transducing metabolic signals to regulate energetic gene programs in response to exercise in skeletal muscle (Figure 5B). Importantly, under both basal conditions and after acute exercise, a significant subset of ERR $\alpha$  target genes important for mitochondrial energy metabolism was found downregulated including *Cycs*, *Idh3g*, and *Pdha1* (Figure 5C). *Cycs* encodes a central component of the mitochondrial electron transport chain and *Idh3g* encodes an enzyme regulating the rate-limiting step of the TCA cycle. *Pdha1* encodes a subunit of the pyruvate dehydrogenase complex, which provides the primary link between glycolysis and the TCA cycle. In further support of a diminished mitochondrial oxidative capacity in the ERR $\alpha$ -deficient animals, an accumulation of the TCA cycle intermediates, citrate, *cis*-aconitate, and  $\alpha$ -ketoglutarate, was observed in the skeletal muscle of these mice after exercise (Figure 5D). In addition, decreased levels of the TCA cycle intermediates, succinate and malate, were found in the ERR $\alpha$ -null mice after exercise (Figure 5D), suggesting a block in the enzymatic activity of the  $\alpha$ -ketoglutarate dehydrogenase ( $\alpha$ -KGDH) complex in these mice responsible for the conversion of  $\alpha$ -ketoglutarate to succinyl coenzyme A. As shown in Figure 5E, mice lacking ERR $\alpha$  displayed a significant decrease in  $\alpha$ -KGDH activity after exercise. A summary of the altered skeletal muscle TCA cycle metabolism

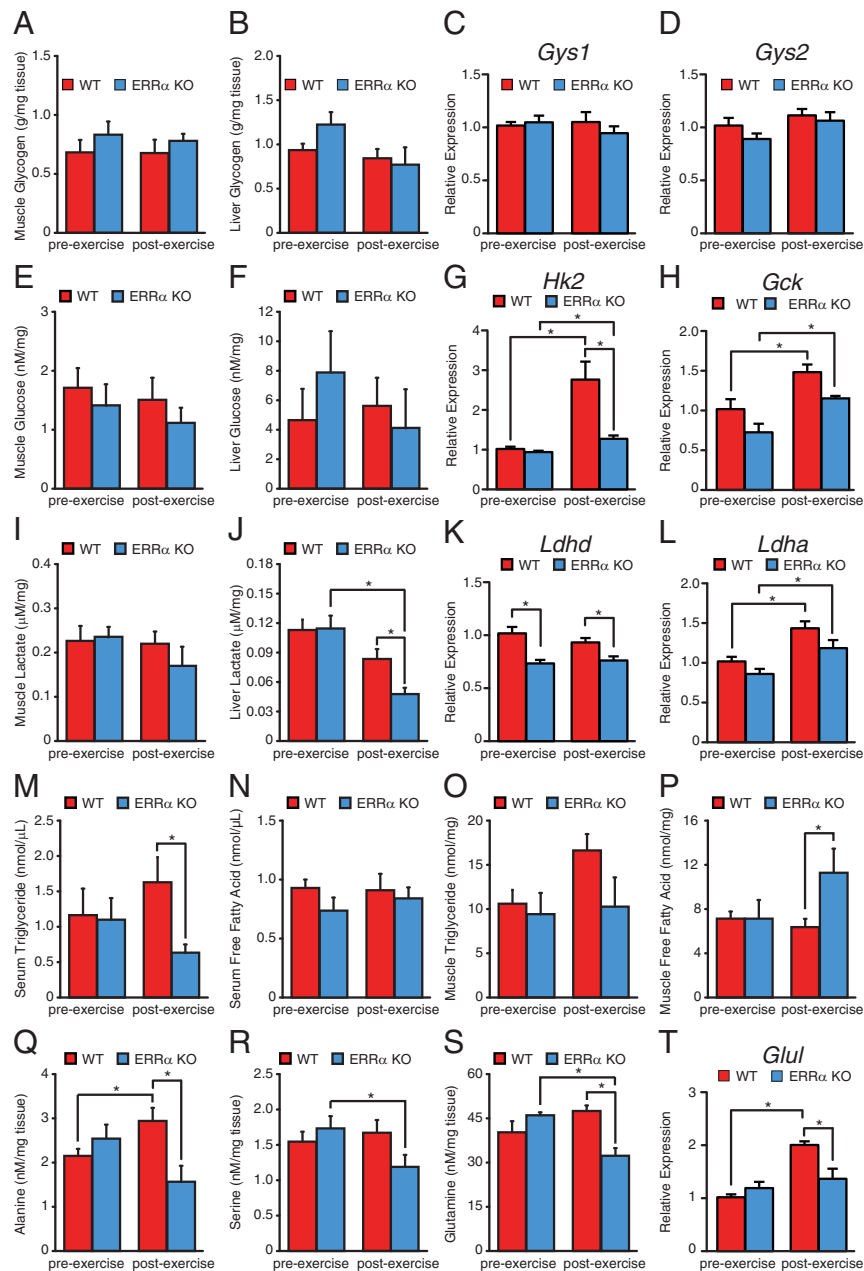

**Figure 6.** Measurement of fuel sources in WT and ERR $\alpha$ -null mice before and after exercise. A and B, Quantification of muscle (A) and liver (B) glycogen levels in WT and ERR $\alpha$ -KO mice before and after exercise. C and D, qRT-PCR analysis of the predominant gastrocnemius (C) and liver (D) glycogen synthase gene in WT and ERR $\alpha$ -null mice before and after exercise. Data are normalized to *Rplp0* levels and expressed as means  $\pm$  SEM. E and F, Quantification of muscle (E) and liver (F) glucose levels in WT and ERR $\alpha$ -KO mice before and after exercise. G and H, qRT-PCR analysis of the predominant gastrocnemius (G) and liver (H) hexokinase gene in WT and ERR $\alpha$ -null mice before and after exercise. Data are normalized to *Rplp0* levels and expressed as means  $\pm$  SEM. \*,  $P < .05$  by unpaired  $t$  test. I and J, Quantification of muscle (I) and liver (J) lactate levels in WT and ERR $\alpha$ -KO mice before and after exercise. \*,  $P < .05$  by unpaired  $t$  test. K and L, qRT-PCR analysis of lactate dehydrogenase (LDH) genes in gastrocnemius (K) and liver (L) WT and ERR $\alpha$ -null mice before and after exercise. Data are normalized to *Rplp0* levels and expressed as means  $\pm$  SEM. \*,  $P < .05$  by unpaired  $t$  test. M–P, Quantification of circulating and skeletal muscle triglyceride and free fatty acids levels in WT and ERR $\alpha$ -KO mice before and after exercise. \*,  $P < .05$  by unpaired  $t$  test. Q–S, Quantification of skeletal muscle amino acid levels in WT and ERR $\alpha$ -KO mice before and after exercise. \*,  $P < .05$  by unpaired  $t$  test. T, qRT-PCR analysis of *Glul* expression in the gastrocnemius of WT and ERR $\alpha$ -null mice before and after exercise. Data are normalized to *Rplp0* levels and expressed as means  $\pm$  SEM. \*,  $P < .05$  by unpaired  $t$  test.

found in the ERR $\alpha$ -null skeletal muscle after acute exhaustive exercise is illustrated in Figure 5F.

Given that peroxisome proliferator-activated receptor  $\gamma$ -coactivator-1 (PGC-1) $\alpha$  and PGC-1 $\beta$  are master regulators of mitochondrial energy metabolism and are coactivators of ERR $\alpha$ , we next examined the gastrocnemius transcript levels of *Ppargc1a* and *Ppargc1b* (18, 27, 28). A small increase in *Ppargc1a* levels was found in the ERR $\alpha$ -null muscle under basal conditions possibly to compensate for the absence of ERR $\alpha$  (Supplemental Figure 4). Although it is well established that exercise induces PGC-1 $\alpha$  expression (29), loss of ERR $\alpha$  strongly impaired the induction of PGC-1 $\alpha$  transcript levels after exercise (Supplemental Figure 4). In contrast, no significant differences in the expression of PGC-1 $\beta$  mRNA levels were observed in mice lacking ERR $\alpha$  before or after exercise (Supplemental Figure 4). Taken together, the data demonstrate a reduction in the ability of gastrocnemius muscle in ERR $\alpha$ -null mice to sustain a genetic program required to increase mitochondrial oxidative capacity underlying the decreased ability of these mice to endure aerobic exercise.

### Loss of ERR $\alpha$ alters energy substrate availability and metabolism

We next investigated the metabolism of the primary energy substrates used in exercised muscle. To this end, the levels of glycogen, glucose, lactate, triglyceride, and amino acids before and 2 hours after acute endurance exercise in ERR $\alpha$ -KO and WT animals were determined (Figure 6). Glycogen is a readily mobilized storage for glucose primarily in the muscle and liver and is of central importance as the first source of energy for muscle contractions, especially during high-intensity exer-

cise. Loss of  $ERR\alpha$  had no effect on skeletal muscle or hepatic glycogen content before or after exercise (Figure 6, A and B). Accordingly, we observed no difference in the mRNA levels of the rate-limiting muscle and hepatic glycogen storage enzymes, *Gys1* and *Gys2*, respectively (Figure 6, C and D). As observed for glycogen, WT and  $ERR\alpha$ -null mice were found to have similar amounts of muscle and hepatic glucose content (Figure 6, E and F). However, in response to exercise, loss of  $ERR\alpha$  significantly impaired the induction of *Hk2*, the predominant muscle enzyme responsible for committing glucose to the glycolytic pathway. A similar trend was observed for *Gck* in the liver (Figure 6H). In addition, an increase in both muscle and liver *Pdk4* levels were found in WT but not  $ERR\alpha$ -null mice after exercise (Supplemental Figure 5, A and B). The data suggest that although glucose levels were restored 2 hours after exercise in both WT and  $ERR\alpha$ -null mice, WT mice have an increased potential for anaerobic glycolysis. Although no differences in muscle lactate levels were found in  $ERR\alpha$ -KO animals, livers lacking  $ERR\alpha$  had significantly lower lactate levels after exercise (Figure 6, I and J). Decreased expression of *Ldhd*, the predominant muscle lactate dehydrogenase isoform responsible for the conversion of lactate to pyruvate in the final step of anaerobic glycolysis, was found in  $ERR\alpha$ -null mice (Figure 6K). A similar trend was observed for the gene encoding the predominant liver *Ldh* isoform, *Ldha* (Figure 6L). Interestingly, the induction of the lactate transporter gene *Slc16a1* was lost in the muscle in the absence of  $ERR\alpha$  (Supplemental Figure 5C). A similar trend was observed in the liver (Supplemental Figure 5D). The reduction in the expression of the lactate transporter and decreased mitochondrial oxidative capacity implies a reduced uptake and oxidation of lactate as a source of energy in the muscle of  $ERR\alpha$ -null mice likely contributing to the observed accumulation of circulating lactate.

Furthermore, although no differences in circulating free fatty acids were observed,  $ERR\alpha$ -null mice were found to have significantly lower serum triglyceride levels after exercise (Figure 6, M and N). In addition, although there was a tendency for higher muscle triglyceride levels in WT mice after exercise, there was significantly higher free fatty acid levels in  $ERR\alpha$ -KO mice (Figure 6, O and P). No difference in mRNA levels of the major skeletal muscle lipid transporter *Fabp3* was observed between WT and  $ERR\alpha$ -null mice (Supplemental Figure 5E). However,  $ERR\alpha$ -null muscles had decreased expression of *Acadvl* encoding an enzyme involved in fatty acid oxidation, possibly reflecting the accumulation of free fatty acids observed in the animals after exercise (Supplemental Figure 5F) (30).

Finally, we observed that the levels of several amino acids including alanine, serine, and glutamine were not replenished after acute exhaustive exercise in the  $ERR\alpha$ -KO skeletal muscle compared with WT (Figure 6, Q–S, and Supplemental Table 4). Of interest, the induction of the mRNA levels of the gene responsible for glutamine synthesis, *Glul*, after exercise in WT mice was lost in the  $ERR\alpha$ -null muscle, reflecting the impaired restoration of glutamine levels in these mice (Figure 6T). Collectively, our findings suggest that the availability, transformation, or replenishment of several substrates important for energy production is altered in the  $ERR\alpha$ -KO animals.

### **$ERR\alpha$ is implicated in several aspects of muscle fitness**

We next explored whether other factors that could also contribute to the diminished voluntary physical activity and dynamic muscle endurance of the KO mice. To this end, we compared the genes that were differentially regulated in gastrocnemius muscle upon exercise between WT and  $ERR\alpha$ -KO mice. First, a lower number of exercise-responsive genes were found in the  $ERR\alpha$ -KO animals compared with WT (1204 vs 1541) (Figure 7A). Functional analysis of the differentially regulated genes using IPA notably revealed a higher enrichment of genes implicated in the Nuclear respiratory factor 2 (NRF2)-mediated oxidative stress response, glucocorticoid (GC) receptor signaling, cholesterol biosynthesis and protein ubiquitination in the exercised WT animals (Figure 7B). In response to exercise,  $ERR\alpha$ -null mice were found to have several genes significantly modulated in the pregnenolone biosynthesis pathway. Pregnenolone is synthesized from cholesterol and is a precursor for several steroid hormones including GCs. The NRF2 pathway plays an important role in limiting muscle damage induced by excessive oxidative stress after exercise (31, 32). GC receptor signaling aids in the maintenance of muscle fiber integrity and the disposition of altered organelles through the regulation of the autophagic machinery (33, 34). Although *Hmox1* and *Hspa1b*, involved, respectively, in oxidative stress response and GC receptor signaling, were induced in both WT and  $ERR\alpha$ -null mice, the degree of induction was significantly blunted in the absence of  $ERR\alpha$  (Figure 7C). The plasticity of skeletal muscle is highlighted by the remodeling and substantial changes in mass via the ubiquitin proteasome system in response to altered physical activity levels (35). Although the levels of *Ubc*, encoding ubiquitin C, were induced in a similar manner in both WT and  $ERR\alpha$ -null mice after exercise (Figure 7C), the induction of the genes involved in muscle atrophy and in the ubiquitin-proteasome system, *Foxo1*,



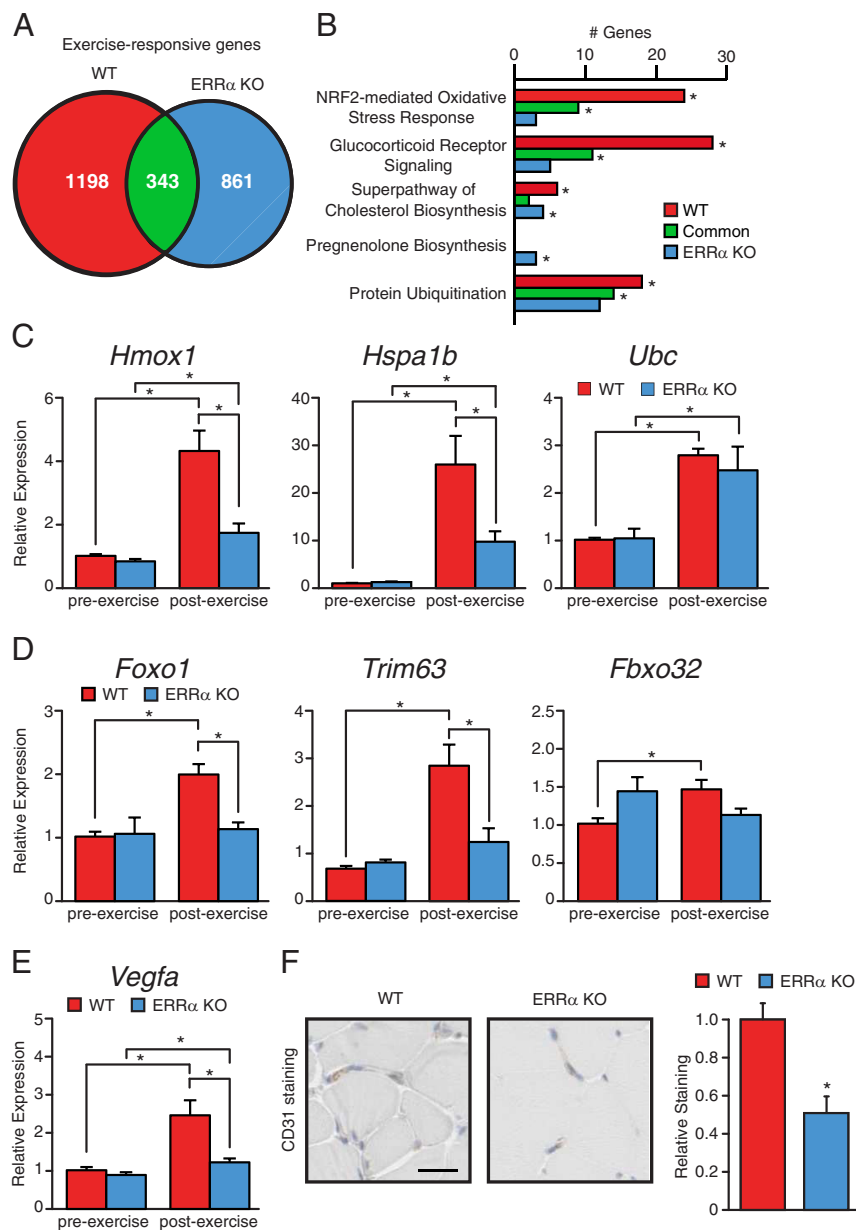

**Figure 7.** Loss of ERR $\alpha$  impairs exercise-dependent transcriptional programs in skeletal muscle. A, Venn diagrams illustrating the overlap in number of exercise-responsive genes in gastrocnemius muscle between WT and ERR $\alpha$ -KO mice. B, The number of exercise-responsive genes associated with various biological processes identified by IPA are shown for WT and ERR $\alpha$ -KO gastrocnemius. \* $P < .05$ . C–E, qRT-PCR analysis of genes identified in B. Data are normalized to *Rplp0* levels and expressed as means  $\pm$  SEM. \*,  $P < .05$  by unpaired  $t$  test. F, CD31 staining and quantification of WT and ERR $\alpha$ -null gastrocnemius cross-sections. \*,  $P < .05$  by unpaired  $t$  test.

*Trim63*, and *Fbxo32*, in response to exercise was lost in ERR $\alpha$ -null mice (Figure 7D).

Furthermore, we identified a potential role for ERR $\alpha$  in exercise-induced angiogenesis, a common adaptive response to exercise training in skeletal muscle (36). Angiogenesis is necessary to carry the increasing oxygen demand needed for oxidative metabolism during exercise. After exercise, we observed a significantly greater induction in the mRNA level of the angiogenic factor *Vegfa* in

WT animals compared with the ERR $\alpha$ -null mice (Figure 7E). In addition, evaluation of vascularization of gastrocnemius muscles showed reduced density of vessels and lower positive staining with the CD31 endothelial marker (Figure 7F). Taken together, the data implicate ERR $\alpha$  in the regulation of additional genetic programs important for muscle fitness.

## Discussion

Recent studies have established vital roles for nuclear receptors in the regulation of muscle energy metabolism and exercise-dependent muscle remodeling and thus the potential for the development of exercise mimetics or pharmacological compounds that could enhance the adaptive response in exercisers (26, 37). In the current work, we demonstrated that the nuclear receptor ERR $\alpha$ , although seemingly dispensable for fiber type specification, is a critical transcription factor regulating physiological processes in muscle that are key determinants of performance, global motor activity, and adaptation to exercise-induced stress.

Our work first shows that ablation of ERR $\alpha$  expression in mice affects their muscle mass, as shown by reduced size of several muscles in the transgenic animals. Genetic or therapeutic inhibition of ERR $\alpha$  in mice resulted in a striking decrease in both physical activity and exercise capacity. Gene expression profiling, metabolic, and metabolomics studies demonstrate an essential role for

ERR $\alpha$  in muscle metabolic function. Mice lacking ERR $\alpha$  have reduced expression of many genes involved in mitochondrial oxidative metabolism and the TCA cycle, resulting in the accumulation of several TCA cycle intermediates including citrate and  $\alpha$ -ketoglutarate in response to the high energetic demands of exercise. In addition, ERR $\alpha$ -null mice exhibited decreased  $\alpha$ -KGDH enzyme activity after acute exhaustive exercise, further demon-

strating loss of mitochondrial metabolic homeostasis in these mice. Moreover, we show that the absence of  $ERR\alpha$  affects the expression of genes associated with substrate transport/uptake and metabolism such as *Slc16a1*, *Ldhd*, *Glul*, and *Hk2*. Accordingly, exhausted  $ERR\alpha$ -null mice exhibited lactatemia, supporting the reduced exercise tolerance observed in these mice. Furthermore, circulating triglycerides and several amino acids in the muscle including alanine and glutamine were not replenished during recovery to exercise. Mechanistically, it should be noted that our previous functional genomics studies identified  $ERR\alpha$  as a direct regulator of numerous genes involved in the metabolic pathways described herein (38–42) (Figure 8 and Supplemental Table 5).

Like  $ERR\alpha$ , the ERR coactivator PGC-1 $\alpha$  has been shown to play a key role in exercise performance. Studies with muscle-specific PGC-1 $\alpha$  transgenic or null mice demonstrate that PGC-1 $\alpha$  expression is associated with improved exercise tolerance associated with increased mitochondrial gene expression and activity and resistance to exercise-induced blood lactate accumulation via downregulation of *Ldha* and upregulation of *Ldhd* and *Slc16a1* expression (43–45). Although we observed no differences in *Ldha* or *Ldhd* transcript levels in  $ERR\alpha$ -null gastrocnemius, decreased mRNA levels of *Ldhd* were observed in these mice. Because the loss of  $ERR\alpha$  resulted in decreased *Slc16a1* expression and blocked the induction of this gene after exercise, our data suggest that  $ERR\alpha$  promotes muscle lactate uptake and oxidation for the generation of energy as found for PGC-1 $\alpha$  (43). Although the authors did not find an ERR binding consensus motif in the promoter of *Slc16a1*,  $ERR\alpha$  is indeed recruited to this gene at

a consensus ERR response element (ERRE), TGACCTTGG, located just 444 bp downstream of the transcription start site of the gene (39).

Aside from the involvement of  $ERR\alpha$  in metabolic adaptations to exercise, we found that the receptor is important for the modulation of a set of genes that are needed to reduce exercise-induced muscle damage. In particular, these  $ERR\alpha$ -dependent pathways work to counteract localized oxidative stress and inflammation, 2 processes associated with impaired muscular performance. Specifically, functional analysis of the exercise-responsive genes in the muscle of  $ERR\alpha$ -null mice identified an impaired NRF2-mediated oxidative stress response (Figure 7B) (31, 32). This result is consistent with previous observations showing that  $ERR\alpha$  facilitates the repair and functional recovery of skeletal muscle in response to cardiotoxin-induced injury (17–19). In addition, we found a number of  $ERR\alpha$ -dependent genes involved in skeletal muscle plasticity including the ubiquitin proteasome pathway (*Trim63*, *Hspa1b*, and *Hspa9*) (Figure 8 and Supplemental Table 5). Thus, our findings implicate  $ERR\alpha$  in tissue remodeling and changes in muscle mass to adapt to physiological factors such as exercise (35). Finally, we show that  $ERR\alpha$  is involved in skeletal muscle vascularization, as indicated by decreased staining for the endothelial marker in the gastrocnemius of the  $ERR\alpha$ -null mice and in skeletal muscle neovascularization, as shown by the reduced induction of the potent angiogenic factor *Vegfa* after exercise. Of note, transgenic overexpression of  $ERR\gamma$  was shown to be sufficient to enable anaerobic muscles to acquire enhanced oxidative capacity and dense vasculature (46). In that study, the morpholog-

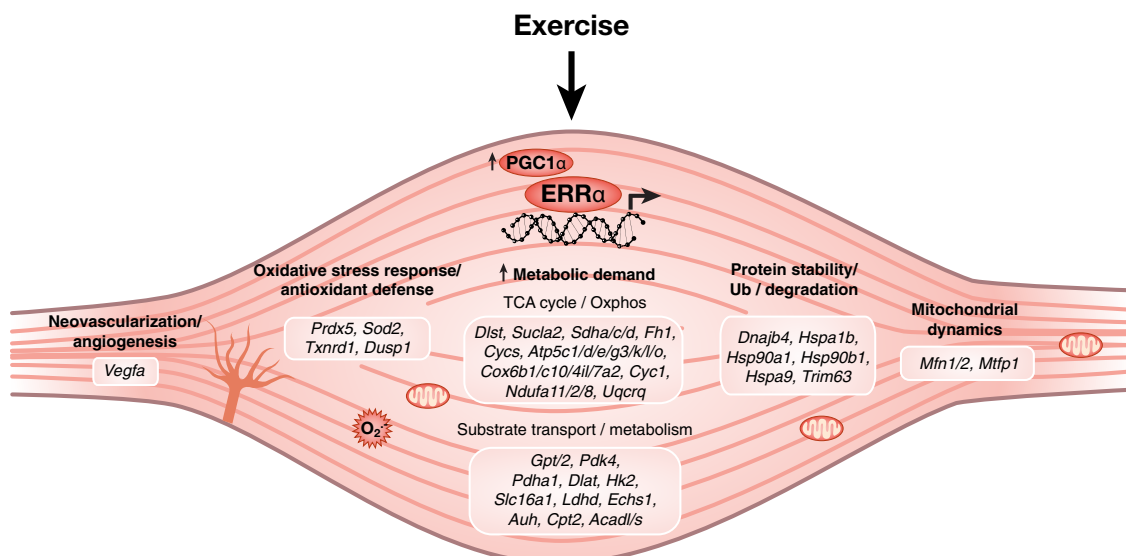

**Figure 8.**  $ERR\alpha$  is essential for skeletal muscle fitness. Schematic representation of biological processes coordinated by  $ERR\alpha$  in exercise-induced muscle remodeling. Our model includes the well-characterized exercise-induced expression of the  $ERR\alpha$  coactivator PGC-1 $\alpha$ , also observed in this study (Supplemental Figure 4). All genes described in this figure are known direct transcriptional targets of  $ERR\alpha$  (Supplemental Table 5).

ical remodeling was linked to the induction of genes involved in oxidative phosphorylation, fatty acid oxidation, and proangiogenic genes, more specifically *Vegfa*. Thus, as previously demonstrated in the heart (14, 47), ERR $\alpha$  and ERR $\gamma$  orchestrate common transcriptional programs to enhance mitochondrial oxidative potential required for exercise performance and fitness. However, in contrast to muscle overexpressing ERR $\gamma$  (46), global loss of ERR $\alpha$  had no significant effect on myofibrillar gene expression after an acute exercise regimen. Our results thus suggest that ERR $\alpha$  is dispensable for fiber type specification in skeletal muscle as previously observed for the ERR coactivators PGC-1 $\alpha$  and PGC-1 $\beta$  (40).

Collectively, our study demonstrates that the nuclear receptor ERR $\alpha$ , although not required for fiber type composition, is essential for the coordinate regulation of metabolic and stress response programs necessary for muscle fitness and endurance. Altered muscle function and metabolism are an underlying factor in many pathological conditions and chronic diseases. The observation that the ERR $\alpha$  inverse agonist C29 diminishes running endurance in a manner similar to the genetic ablation of ERR $\alpha$  suggests that, in contrast, a full ERR $\alpha$  agonist could possibly serve to potentiate the adaptive response to exercise stimuli. In particular, our results suggest that modulation of ERR $\alpha$  activity could provide a new therapeutic avenue in the prevention and management of muscle wasting and weakness in many disease states and conditions including aging, cancer cachexia, sepsis, denervation, chronic kidney or heart failure, and muscular dystrophies.

## Acknowledgments

We thank C. Ouellet and M. Ghahremani for their technical assistance, Drs D. Avizonis and G. Bridon for metabolomics analyses, and S. Labrecque for figure design.

Address all correspondence and requests for reprints to: Vincent Giguère, PhD, Goodman Cancer Research Centre, McIntyre Building, Suite 710A, 1160 Pine Avenue West, Montréal, Québec, Canada H3A 1A3. E-mail: [vincent.giguere@mcgill.ca](mailto:vincent.giguere@mcgill.ca).

M.-C.P. was supported in part by the Natural Sciences and Engineering Research Council of Canada and the Fonds de Recherche Santé Québec. The study was supported by a grant from the Canadian Institutes for Health Research (MOP-64275) to V.G. The metabolomics Core Facility is supported by the Canada Foundation for Innovation (project number 21875), the Dr John R. and Clara M. Fraser Memorial Trust and the Terry Fox Foundation (TFF Oncometabolism Team Grant 116128) and McGill University.

Disclosure Summary: The authors have nothing to disclose.

## References

- Booth FW, Thomason DB. Molecular and cellular adaptation of muscle in response to exercise: perspectives of various models. *Physiol Rev*. 1991;71:541–585.
- Hawley JA, Holloszy JO. Exercise: it's the real thing! *Nutr Rev*. 2009;67:172–178.
- Yan Z, Okutsu M, Akhtar YN, Lira VA. Regulation of exercise-induced fiber type transformation, mitochondrial biogenesis, and angiogenesis in skeletal muscle. *J Appl Physiol*. 2011;110:264–274.
- Schiaffino S, Reggiani C. Fiber types in mammalian skeletal muscles. *Physiol Rev*. 2011;91:1447–1531.
- Giguère V, Yang N, Segui P, Evans RM. Identification of a new class of steroid hormone receptors. *Nature*. 1988;331:91–94.
- Deblois G, Giguère V. Functional and physiological genomics of estrogen-related receptors (ERRs) in health and disease. *Biochim Biophys Acta*. 2011;1812:1032–1040.
- Eichner LJ, Giguère V. Estrogen related receptors (ERRs): a new dawn in the control of mitochondrial gene networks. *Mitochondrion*. 2011;11:544–552.
- Villena JA, Kralli A. ERR $\alpha$ : a metabolic function for the oldest orphan. *Trends Endocrinol Metab*. 2008;19:269–276.
- Sladek R, Bader JA, Giguère V. The orphan nuclear receptor estrogen-related receptor alpha is a transcriptional regulator of the human medium-chain acyl coenzyme A dehydrogenase gene. *Mol Cell Biol*. 1997;17:5400–5409.
- Bookout AL, Jeong Y, Downes M, Yu RT, Evans RM, Mangelsdorf DJ. Anatomical profiling of nuclear receptor expression reveals a hierarchical transcriptional network. *Cell*. 2006;126:789–799.
- Ichida M, Nemoto S, Finkel T. Identification of a specific molecular repressor of the peroxisome proliferator-activated receptor  $\gamma$  coactivator-1 alpha (PGC-1alpha). *J Biol Chem*. 2002;277:50991–50995.
- Villena JA, Hock MB, Chang WY, Barcas JE, Giguère V, Kralli A. Orphan nuclear receptor estrogen-related receptor alpha is essential for adaptive thermogenesis. *Proc Natl Acad Sci U S A*. 2007;104:1418–1423.
- Huss JM, Imahashi K, Dufour CR, et al. The nuclear receptor ERR $\alpha$  is required for the bioenergetic and functional adaptation to cardiac pressure overload. *Cell Metab*. 2007;6:25–37.
- Dufour CR, Wilson BJ, Huss JM, et al. Genome-wide orchestration of cardiac functions by the orphan nuclear receptors ERR $\alpha$  and gamma. *Cell Metab*. 2007;5:345–356.
- Giguère V. Transcriptional control of energy homeostasis by the estrogen-related receptors. *Endocr Rev*. 2008;29:677–696.
- Deblois G, Giguère V. Oestrogen-related receptors in breast cancer: control of cellular metabolism and beyond. *Nat Rev Cancer*. 2013;13:27–36.
- Murray J, Huss JM. Estrogen-related receptor  $\alpha$  regulates skeletal myocyte differentiation via modulation of the ERK MAP kinase pathway. *Am J Physiol Cell Physiol*. 2011;301:C630–C645.
- Shao D, Liu Y, Liu X, et al. PGC-1 beta-regulated mitochondrial biogenesis and function in myotubes is mediated by NRF-1 and ERR $\alpha$ . *Mitochondrion*. 2010;10:516–527.
- Wang SC, Myers S, Dooks C, Capon R, Muscat GE. An ERR $\beta/\gamma$  agonist modulates GR $\alpha$  expression, and glucocorticoid responsive gene expression in skeletal muscle cells. *Mol Cell Endocrinol*. 2010;315:146–152.
- Luo J, Sladek R, Carrier J, Bader JA, Richard D, Giguère V. Reduced fat mass in mice lacking orphan nuclear receptor estrogen-related receptor alpha. *Mol Cell Biol*. 2003;23:7947–7956.
- Yoshioka M, Boivin A, Bolduc C, St-Amand J. Gender difference of androgen actions on skeletal muscle transcriptome. *J Mol Endocrinol*. 2007;39:119–133.
- Patch RJ, Searle LL, Kim AJ, et al. Identification of diaryl ether-based ligands for estrogen-related receptor  $\alpha$  as potential antiandrogenic agents. *J Med Chem*. 2011;54:788–808.

23. Dufour CR, Levasseur MP, Pham NH, et al. Genomic convergence among ERR $\alpha$ , PROX1, and BMAL1 in the control of metabolic clock outputs. *PLoS Genet.* 2011;7:e1002143.
24. Herzog B, Cardenas J, Hall RK, et al. Estrogen-related receptor alpha is a repressor of phosphoenolpyruvate carboxykinase gene transcription. *J Biol Chem.* 2006;281:99–106.
25. Gleeson TT, Putnam RW, Bennett AF. Histochemical, enzymatic, and contractile properties of skeletal muscle fibers in the lizard *Dipsosaurus dorsalis*. *J Exp Zool.* 1980;214:293–302.
26. Egan B, Zierath JR. Exercise metabolism and the molecular regulation of skeletal muscle adaptation. *Cell Metab.* 2013;17:162–184.
27. Austin S, St-Pierre J. PGC1 $\alpha$  and mitochondrial metabolism—emerging concepts and relevance in ageing and neurodegenerative disorders. *J Cell Sci.* 2012;125:4963–4971.
28. Huss JM, Kopp RP, Kelly DP. Peroxisome proliferator-activated receptor coactivator-1alpha (PGC-1alpha) coactivates the cardiac-enriched nuclear receptors estrogen-related receptor-alpha and -gamma. Identification of novel leucine-rich interaction motif within PGC-1alpha. *J Biol Chem.* 2002;277:40265–40274.
29. Baar K, Wende AR, Jones TE, et al. Adaptations of skeletal muscle to exercise: rapid increase in the transcriptional coactivator PGC-1. *FASEB J.* 2002;16:1879–1886.
30. Yoshioka M, Doucet E, St-Pierre S, et al. Impact of high-intensity exercise on energy expenditure, lipid oxidation and body fatness. *Int J Obes Relat Metab Disord.* 2001;25:332–339.
31. Miller CJ, Gounder SS, Kannan S, et al. Disruption of Nrf2/ARE signaling impairs antioxidant mechanisms and promotes cell degradation pathways in aged skeletal muscle. *Biochim Biophys Acta.* 2012;1822:1038–1050.
32. Muthusamy VR, Kannan S, Sadhaasivam K, et al. Acute exercise stress activates Nrf2/ARE signaling and promotes antioxidant mechanisms in the myocardium. *Free Radic Biol Med.* 2012;52:366–376.
33. Waddell DS, Baehr LM, van den Brandt J, et al. The glucocorticoid receptor and FOXO1 synergistically activate the skeletal muscle atrophy-associated MuRF1 gene. *Am J Physiol Endocrinol Metab.* 2008;295:E785–E797.
34. Masiero E, Agatea L, Mammucari C, et al. Autophagy is required to maintain muscle mass. *Cell Metab.* 2009;10:507–515.
35. Murton AJ, Constantin D, Greenhaff PL. The involvement of the ubiquitin proteasome system in human skeletal muscle remodelling and atrophy. *Biochim Biophys Acta.* 2008;1782:730–743.
36. Gustafsson T, Kraus WE. Exercise-induced angiogenesis-related growth and transcription factors in skeletal muscle, and their modification in muscle pathology. *Front Biosci.* 2001;6:D75–D89.
37. Fan W, Atkins AR, Yu RT, Downes M, Evans RM. Road to exercise mimetics: targeting nuclear receptors in skeletal muscle. *J Mol Endocrinol.* 2013;51:T87–T100.
38. Charest-Marcotte A, Dufour CR, Wilson BJ, et al. The homeobox protein Prox1 is a negative modulator of ERR $\alpha$ /PGC-1 $\alpha$  bioenergetic functions. *Genes Dev.* 2010;24:537–542.
39. Chaveroux C, Eichner LJ, Dufour CR, et al. Molecular and genetic crosstalks between mTOR and ERR $\alpha$  are key determinants of rapamycin-induced nonalcoholic fatty liver. *Cell Metab.* 2013;17:586–598.
40. Zechner C, Lai L, Zechner JF, et al. Total skeletal muscle PGC-1 deficiency uncouples mitochondrial derangements from fiber type determination and insulin sensitivity. *Cell Metab.* 2010;12:633–642.
41. Sonoda J, Laganière J, Mehl IR, et al. Nuclear receptor ERR alpha and coactivator PGC-1 beta are effectors of IFN-gamma-induced host defense. *Genes Dev.* 2007;21:1909–1920.
42. Tremblay AM, Dufour CR, Ghahremani M, Reudelhuber TL, Giguère V. Physiological genomics identifies estrogen-related receptor alpha as a regulator of renal sodium and potassium homeostasis and the renin-angiotensin pathway. *Mol Endocrinol.* 2010;24:22–32.
43. Summermatter S, Santos G, Pérez-Schindler J, Handschin C. Skeletal muscle PGC-1 $\alpha$  controls whole-body lactate homeostasis through estrogen-related receptor  $\alpha$ -dependent activation of LDH B and repression of LDH A. *Proc Natl Acad Sci U S A.* 2013;110:8738–8743.
44. Handschin C, Chin S, Li P, et al. Skeletal muscle fiber-type switching, exercise intolerance, and myopathy in PGC-1alpha muscle-specific knock-out animals. *J Biol Chem.* 2007;282:30014–30021.
45. Arany Z, Foo SY, Ma Y, et al. HIF-independent regulation of VEGF and angiogenesis by the transcriptional coactivator PGC-1alpha. *Nature.* 2008;451:1008–1012.
46. Narkar VA, Fan W, Downes M, et al. Exercise and PGC-1 $\alpha$ -independent synchronization of type I muscle metabolism and vasculature by ERR $\gamma$ . *Cell Metab.* 2011;13:283–293.
47. Alaynick WA, Kondo RP, Xie W, et al. ERRgamma directs and maintains the transition to oxidative metabolism in the postnatal heart. *Cell Metab.* 2007;6:13–24.
